# Supplementary material for: Adjustable antiperovskite cobalt-based nitrides as efficient electrocatalysts for overall water splitting
Source: Royal Society of Chemistry journal article supplement (doi:10.1039/d2ta03313e), 2022-01-01
Supplement: d2ta03313e1.pdf [file d2ta03313e1.pdf]

Electronic Supplementary Material (ESI) for Journal of Materials Chemistry A.

Supporting Information

**Adjustable Antiperovskite Cobalt-Based Nitrides as Efficient Electrocatalysts for Overall Water Splitting**

Lili Zhu,<sup>ab</sup> Changdian Li,<sup>ab</sup> Han Li,<sup>ab</sup> Hui Li,<sup>ab</sup> Ziqiang Wu,<sup>ab</sup> Yanan Huang,<sup>\*a</sup> Xuebin Zhu<sup>\*ab</sup> and Yuping Sun<sup>acd</sup>

<sup>a</sup> Key Laboratory of Materials Physics, Institute of Solid State Physics, HFIPS, Chinese Academy of Sciences, Hefei 230031, People's Republic of China

<sup>b</sup> University of Science and Technology of China, Hefei 230026, People's Republic of China

<sup>c</sup> High Magnetic Field Laboratory, HFIPS, Chinese Academy of Sciences, Hefei 230031, People's Republic of China

<sup>d</sup> Collaborative Innovation Center of Advanced Microstructures, Nanjing University, Nanjing 210093, People's Republic of China

**\*Corresponding authors E-mail:** ynhuang@issp.ac.cn; xbzhu@issp.ac.cn

## List of Texts, Figures and Tables

**Text S1.** Experimental section.

**Text S2.** Material characterizations.

**Text S3.** Electrochemical measurements and evaluations.

**Fig. S1** (a) XRD pattern and (b) SEM image of bare nickel foam (NF).

**Fig. S2** XRD patterns of  $\text{CoN}_{0.73}\text{Co}_3$ .

**Fig. S3** XPS spectra of  $\text{CoN}_{0.73}\text{Co}_3$ , (a) survey scan, (b) Co 2p, (c) N 1s.

**Fig. S4** (a, b) SEM images of Cu-Co bimetallic hydroxide/NF (precursor of  $\text{CuNCo}_3/\text{NF}$ ). (c) XRD patterns of Cu-Co bimetallic hydroxide/NF. (d, e) SEM images of Co hydroxide/NF (precursor of  $\text{CoN}_{0.73}\text{Co}_3/\text{NF}$ ). (f) XRD patterns of Co hydroxide/NF.

**Fig. S5** Electrocatalytical OER testing in 1 M KOH. (a) LSV curves for precursors of  $\text{CuNCo}_3/\text{NF}$ ,  $\text{CoN}_{0.73}\text{Co}_3/\text{NF}$ ,  $\text{RuO}_2$  and NF. (b) Tafel plots. (c) Nyquist plots and equivalent circuit.

**Fig. S6** CV curves of OER testing for (a)  $\text{CuNCo}_3/\text{NF}$  and (b)  $\text{CoN}_{0.73}\text{Co}_3/\text{NF}$  with 20, 40, 60, 80 and 100  $\text{mV s}^{-1}$  in non-Faradaic potential range.

**Fig. S7** CV curves of OER testing for precursors of (a)  $\text{CuNCo}_3/\text{NF}$  and (b)  $\text{CoN}_{0.73}\text{Co}_3/\text{NF}$  with 20, 40, 60, 80 and 100  $\text{mV s}^{-1}$  in non-Faradaic potential range.

**Fig. S8** Electrocatalytical HER testing results in 1 M KOH. (a) LSV curves for precursors of  $\text{CuNCo}_3/\text{NF}$  and  $\text{CoN}_{0.73}\text{Co}_3/\text{NF}$ ,  $\text{RuO}_2$  and NF. (b) Tafel plots. (c) Nyquist plots and equivalent circuit.

**Fig. S9** (a) LSV curves and (b) Tafel plots with the mass activity of  $\text{RuO}_2$ ,  $\text{CuNCo}_3/\text{NF}$

and  $\text{CoN}_{0.73}\text{Co}_3/\text{NF}$  for OER. (c) LSV curves and (d) Tafel plots with the mass activity of 20 wt% Pt/C,  $\text{CoN}_{0.73}\text{Co}_3/\text{NF}$  and  $\text{CuNCo}_3/\text{NF}$  for HER.

**Fig. S10** (a) LSV curves and (b) Tafel plots with the mass activity for  $\text{RuO}_2$ , precursors of  $\text{CuNCo}_3/\text{NF}$  and  $\text{CoN}_{0.73}\text{Co}_3/\text{NF}$  for OER. (c) LSV curves and (d) Tafel plots with the mass activity for 20 wt% Pt/C, precursors of  $\text{CoN}_{0.73}\text{Co}_3/\text{NF}$  and  $\text{CuNCo}_3/\text{NF}$  for HER.

**Fig. S11** Polarization curves of (a) OER, (b) HER and (c) two-electrode system for overall water splitting with maximum current density of  $400 \text{ mA cm}^{-2}$ .

**Fig. S12** (a) LSV curves of two-electrode electrolyzers ( $\text{CuNCo}_3/\text{NF} \parallel \text{CoN}_{0.73}\text{Co}_3/\text{NF}$  and  $\text{RuO}_2/\text{NF} \parallel 20 \text{ wt}\% \text{ Pt/C/NF}$ ). (b) Stability test of two-electrode electrolyzer ( $\text{RuO}_2/\text{NF} \parallel 20 \text{ wt}\% \text{ Pt/C/NF}$ ).

**Fig. S13** The long-term durability test of  $\text{CuNCo}_3/\text{NF} \parallel \text{CoN}_{0.73}\text{Co}_3/\text{NF}$  at a current density of  $100 \text{ mA cm}^{-2}$ .

**Fig. S14** Stability tests for (a) OER of  $\text{CuNCo}_3/\text{NF}$  and (b) HER of  $\text{CoN}_{0.73}\text{Co}_3/\text{NF}$ .

**Fig. S15** XRD patterns of (a)  $\text{CuNCo}_3/\text{NF}$ , (b)  $\text{CoN}_{0.73}\text{Co}_3/\text{NF}$  electrodes after stability test (48 h).

**Fig. S16** The high-resolution XPS results for Co 2p, Cu 2p, N 1s and O 1s of  $\text{CuNCo}_3/\text{NF}$  electrode with initial and after stability test (48 h).

**Fig. S17** The high-resolution XPS results for Co 2p and N 1s of  $\text{CoN}_{0.73}\text{Co}_3/\text{NF}$  electrode with initial and after stability test (48 h).

**Fig. S18** The TEM mapping of  $\text{CuNCo}_3$  after stability test (48 h).

**Fig. S19** The TEM mapping of  $\text{CoN}_{0.73}\text{Co}_3$  after stability test (48 h).

**Table S1.** The comparison of various electrocatalysts for overall water splitting.

**Table S2.** The comparison of OER activity of the CuNCo<sub>3</sub>/NF with that of other reported catalysts at the current density of 10 mA cm<sup>-2</sup>.

**Table S3.** The comparison of HER activity of the CoN<sub>0.73</sub>Co<sub>3</sub>/NF with that of other reported catalysts at the current density of 10 mA cm<sup>-2</sup>.

### **Text S1. Experimental section**

Preparation of CuNCo<sub>3</sub>/NF and CoN<sub>0.73</sub>Co<sub>3</sub>/NF: In processing, 1 mmol Cu(NO<sub>3</sub>)<sub>2</sub>·3H<sub>2</sub>O (99.0%, Sinopharm Chemical Reagent Co., Ltd), 3 mmol Co(NO<sub>3</sub>)<sub>2</sub>·6H<sub>2</sub>O (98.5% Sinopharm Chemical Reagent Co., Ltd) and 14 mmol Co(NH<sub>2</sub>)<sub>2</sub> (99.0% Sinopharm Chemical Reagent Co., Ltd) were dissolved into 60 mL deionized water and stirred. Then, the prepared aqueous solution and a NF substrate (XRD pattern and SEM images of bare NF were displayed in Fig. S1) were transferred into a 100 mL stainless-steel autoclave and reacted at 120°C for 10h. After the reaction, the sample was washed with deionized water and alcohol, and dried in an oven at 60°C. The obtained hydrothermal precursor was Cu-Co bimetallic hydroxide/NF. Then, the hydrothermal precursor of Cu-Co bimetallic hydroxide/NF was annealed at 420 °C under the flowing NH<sub>3</sub> atmosphere for 2h (as depicted in Scheme 1). The obtained product was CuNCo<sub>3</sub>/NF. The catalyst loading mass of CuNCo<sub>3</sub>/NF is ~4 mg cm<sup>-2</sup>. Similar processing was carried out to prepare the CoN<sub>0.73</sub>Co<sub>3</sub>/NF, in which 4 mmol Co(NO<sub>3</sub>)<sub>2</sub>·6H<sub>2</sub>O was used to prepare the aqueous solution without addition of Cu(NO<sub>3</sub>)<sub>2</sub>·3H<sub>2</sub>O. The obtained product was CuNCo<sub>3</sub>/NF. The catalyst loading mass of

CuNC<sub>3</sub>/NF is ~4 mg cm<sup>-2</sup>.

Preparation of Pt/C electrode and RuO<sub>2</sub> electrode: The 20 wt% Pt/C and RuO<sub>2</sub> were used as the reference samples for HER and OER, respectively. 10 mg catalyst was dispersed into the solution with 950 μL isopropanol and 50 μL 5 wt% Nafion, and ultrasonically stirred for more than 40 minutes until the dispersed ink was obtained. Then, 400 μL of the dispersed ink was loaded onto NF with the size of 1×1 cm<sup>2</sup> (loading mass of 4 mg cm<sup>-2</sup>). Finally, the as-prepared electrode was dried at room temperature for electrochemical measurements.

### **Text S2. Material characterizations**

X-ray diffraction (XRD, Philips X'pert PRO). Scanning electron microscope (SEM, Quanta 200FEG). Transmission electron microscope (TEM, JEM-2100). The X-ray photoelectron spectroscopy (XPS, Thermo Scientific K-Alpha device with excitation source of Al K<sub>α</sub>).

### **Text S3. Electrochemical measurements and evaluations**

The conventional three-electrode system equipped with N<sub>2</sub> gas flow system was utilized for electrochemical measurements at room temperature in 1 M KOH electrolyte on a CHI660E workstation. Hg/HgO and graphite rod were used as the reference electrode and counter electrode, respectively. The prepared samples were used as the working electrodes. All the potentials were calibrated to reversible hydrogen electrode (RHE) according to the equation  $E (vs. RHE) = E (vs. Hg/HgO) + E^{\circ}_{Hg/HgO} + 0.0591 \text{ pH}$  ( $E^{\circ}_{Hg/HgO}$ : 0.098V, pH: 14). LSV was measured at a scan rate of 2 mV s<sup>-1</sup>. A series of

CV measurements were performed at different scan rates within 20 - 100  $\text{mV s}^{-1}$  in the range of 1.025 - 1.125 V (vs. RHE) in order to calculate the ECSA. The ECSA was calculated as  $\text{ECSA} = C_{\text{dl}}/C_s$ .  $C_{\text{dl}}$  is double-layer capacitance and  $C_s$  represents  $40 \mu\text{F cm}^{-2}$  in 1 M KOH. The  $C_{\text{dl}}$  was obtained by fitting the half slope of current density and scanning rate at the average potential range of CV. EIS was obtained at overpotential of 300 mV and -200 mV (vs. RHE) for OER and HER respectively in the frequency range of 0.1 -  $10^5$  Hz with 5 mV amplitude. The stability of the catalyst was tested by chronoamperometry. All data were calibrated by 90 % iR compensation.

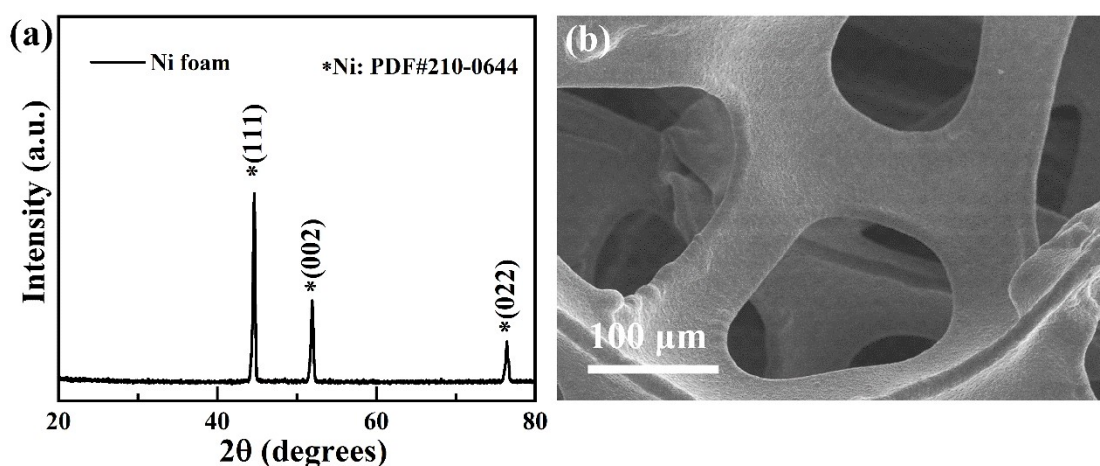

**Fig. S1** (a) XRD pattern and (b) SEM image of bare nickel foam (NF).

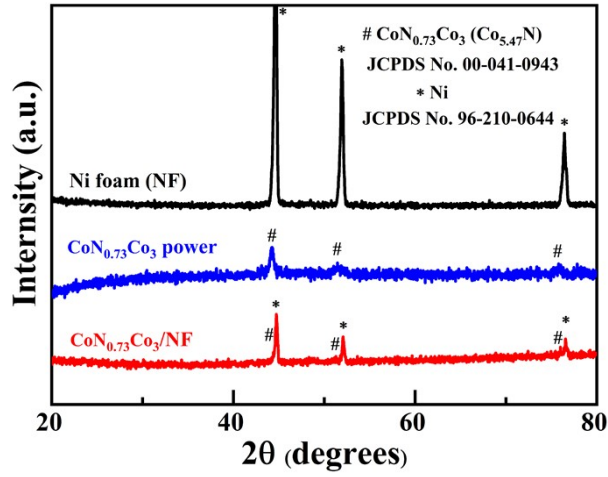

Fig. S2 XRD patterns of CoN<sub>0.73</sub>Co<sub>3</sub>.

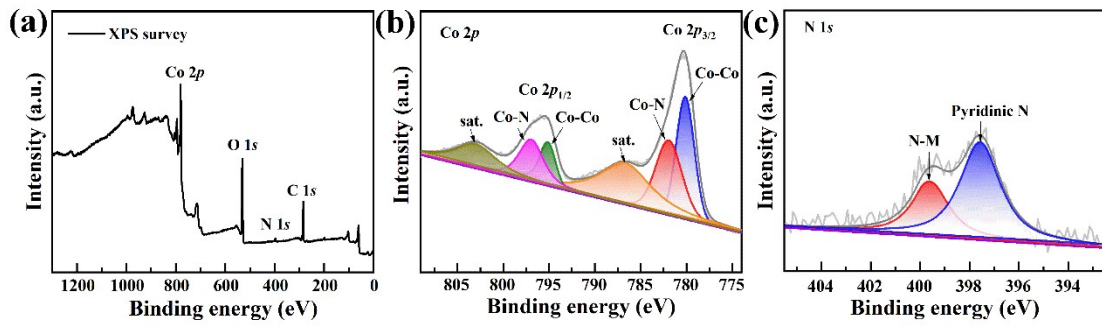

Fig. S3 XPS spectra of CoN<sub>0.73</sub>Co<sub>3</sub>, (a) survey scan, (b) Co 2p, (c) N 1s.

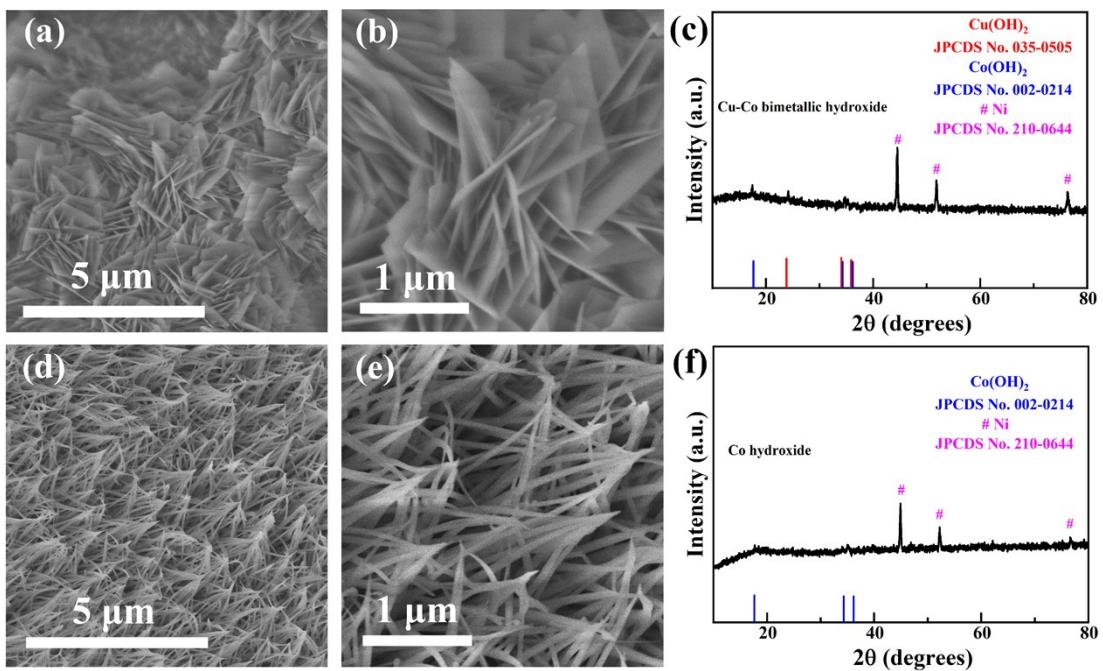

**Fig. S4** (a, b) SEM images of Cu-Co bimetallic hydroxide/NF (precursor of  $\text{CuNCo}_3/\text{NF}$ ). (c) XRD patterns of Cu-Co bimetallic hydroxide/NF. (d, e) SEM images of Co hydroxide/NF (precursor of  $\text{CoN}_{0.73}\text{Co}_3/\text{NF}$ ). (f) XRD patterns of Co hydroxide/NF.

In Fig. S4c, XRD patterns of as-prepared Cu-Co bimetallic hydroxide/NF (precursor of  $\text{CuNCo}_3/\text{NF}$ ) presents the coexistence of  $\text{Cu}(\text{OH})_2$  (JPCDS No.035-0505),  $\text{Co}(\text{OH})_2$  (JPCDS No. 002-0214) and NF (JPCDS No. 210-0644) phases. The peaks at  $24.02^\circ$ ,  $33.83^\circ$  and  $35.52^\circ$  can be indexed to the (021), (002) and (111) plane of  $\text{Cu}(\text{OH})_2$ , and additional peaks at  $17.56^\circ$ ,  $34.62^\circ$  and  $36.27^\circ$  can be assigned to the  $\text{Co}(\text{OH})_2$ .

In Fig. S4f, XRD patterns of as-prepared Co hydroxide/NF (precursor of  $\text{CoN}_{0.73}\text{Co}_3/\text{NF}$ ) shows the coexistence of  $\text{Co}(\text{OH})_2$  (JPCDS No. 002-0214) and NF (JPCDS No. 210-0644) phases. The peaks at about  $17.73^\circ$ ,  $34.21^\circ$  and  $35.95^\circ$  can be indexed to the  $\text{Co}(\text{OH})_2$ .

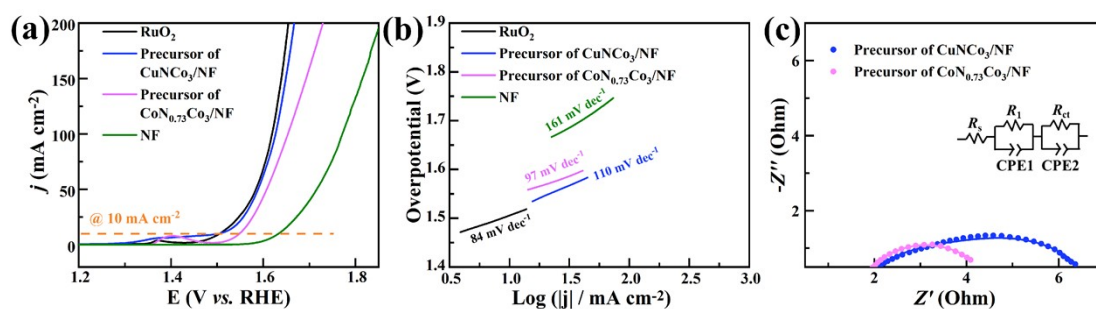

**Fig. S5** Electrocatalytical OER testing in 1.0 M KOH. (a) LSV curves for precursors of  $\text{CuNCo}_3/\text{NF}$ ,  $\text{CoN}_{0.73}\text{Co}_3/\text{NF}$ ,  $\text{RuO}_2$  and NF. (b) Tafel plots. (c) Nyquist plots and equivalent circuit.



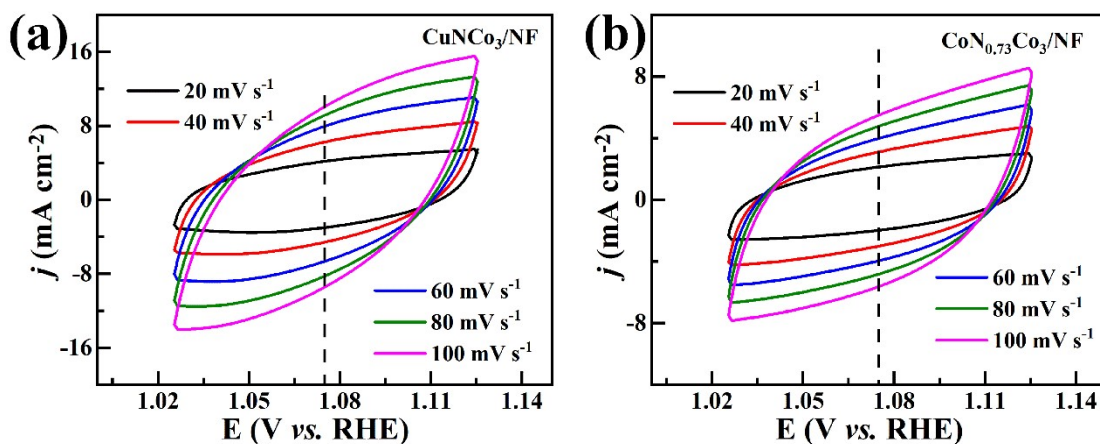

**Fig. S6** CV curves of OER testing for (a) CuNCo<sub>3</sub>/NF and (b) CoN<sub>0.73</sub>Co<sub>3</sub>/NF with 20, 40, 60, 80 and 100 mV s<sup>-1</sup> in non-Faradaic potential range.

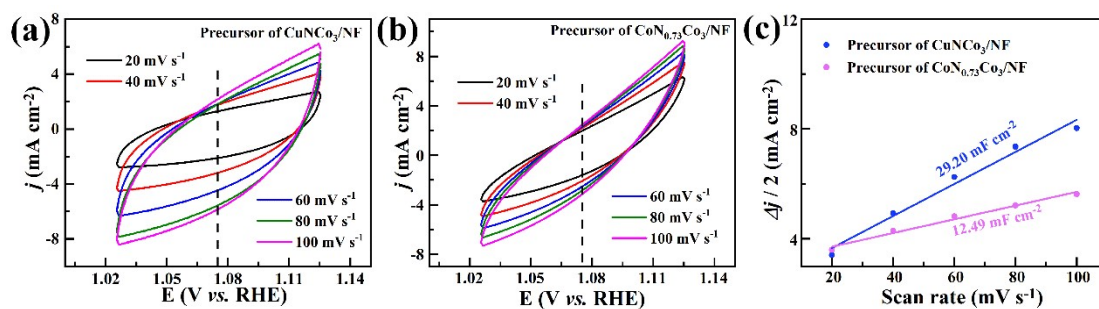

**Fig. S7** CV curves of OER testing for precursors of (a) CuNCo<sub>3</sub>/NF and (b) CoN<sub>0.73</sub>Co<sub>3</sub>/NF with 20, 40, 60, 80 and 100 mV s<sup>-1</sup> in non-Faradaic potential range.

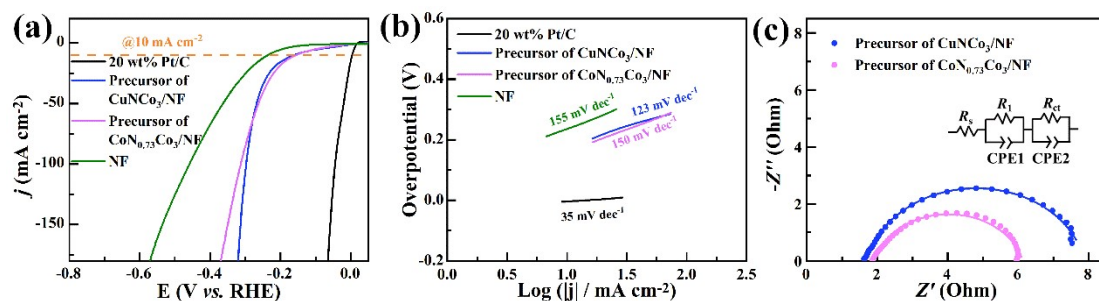

**Fig. S8** Electrocatalytic HER testing results in 1 M KOH. (a) LSV curves for precursors of CuNCo<sub>3</sub>/NF and CoN<sub>0.73</sub>Co<sub>3</sub>/NF, RuO<sub>2</sub> and NF. (b) Tafel plots. (c)

Nyquist plots and equivalent circuit.

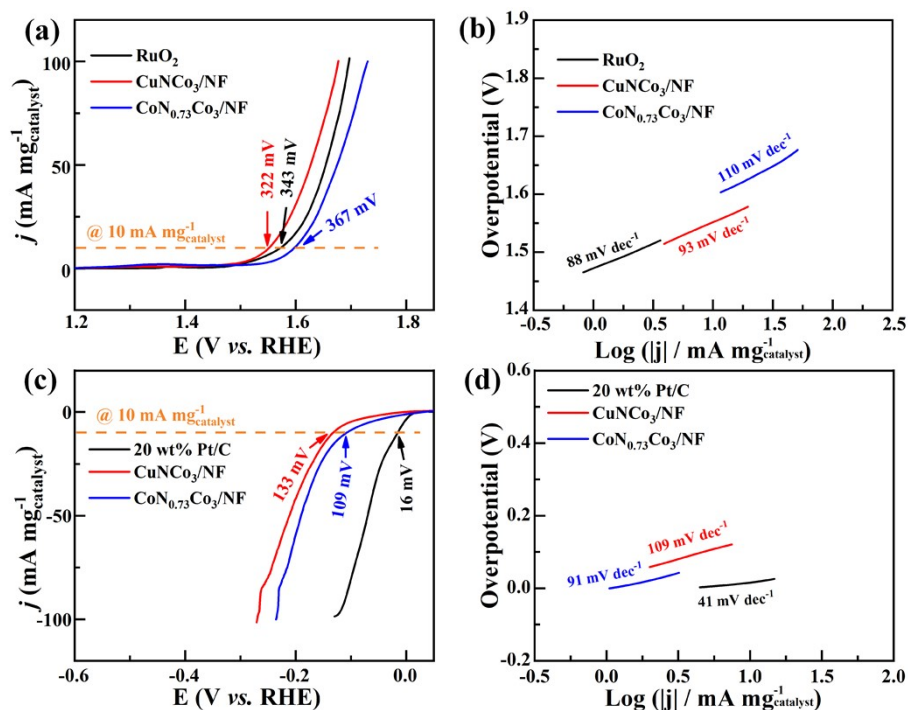

**Fig. S9** (a) LSV curves and (b) Tafel plots with the mass activity of RuO<sub>2</sub>, CuNCo<sub>3</sub>/NF and CoN<sub>0.73</sub>Co<sub>3</sub>/NF for OER. (c) LSV curves and (d) Tafel plots with the mass activity of 20 wt% Pt/C, CoN<sub>0.73</sub>Co<sub>3</sub>/NF and CuNCo<sub>3</sub>/NF for HER.

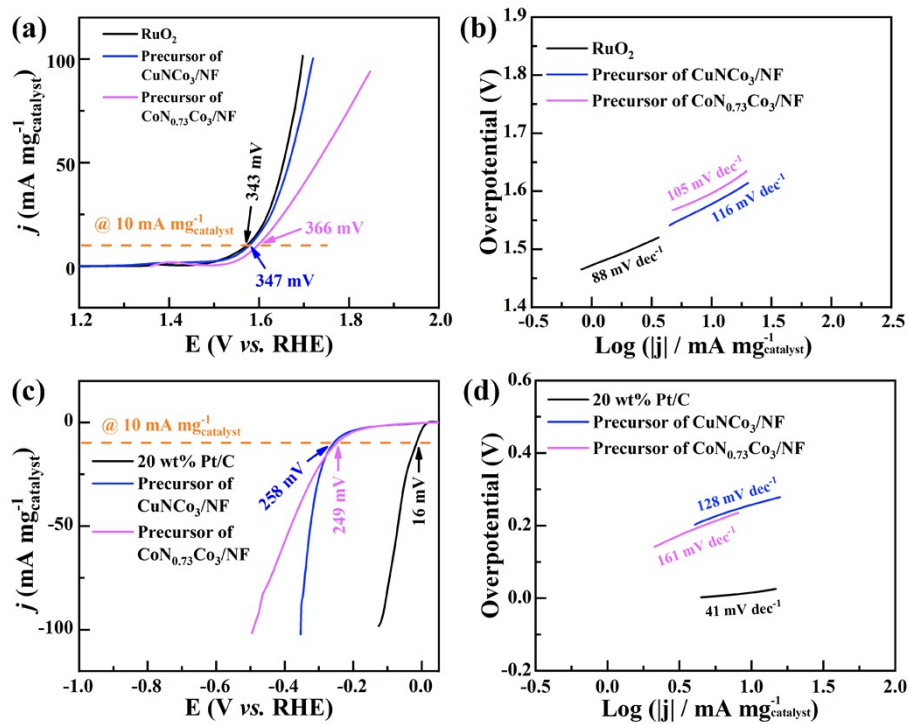

**Fig. S10** (a) LSV curves and (b) Tafel plots with the mass activity for RuO<sub>2</sub>, precursors of CuNC<sub>0.3</sub>/NF and CoN<sub>0.73</sub>Co<sub>3</sub>/NF for OER. (c) LSV curves and (d) Tafel plots with the mass activity for 20 wt% Pt/C, precursors of CoN<sub>0.73</sub>Co<sub>3</sub>/NF and CuNC<sub>0.3</sub>/NF for HER.

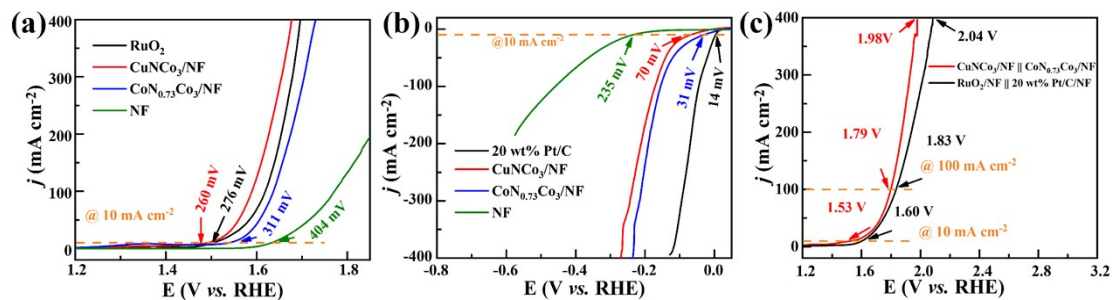

**Fig. S11** Polarization curves of (a) OER, (b) HER and (c) two-electrode system for overall water splitting with maximum current density of 400 mA cm<sup>-2</sup>.

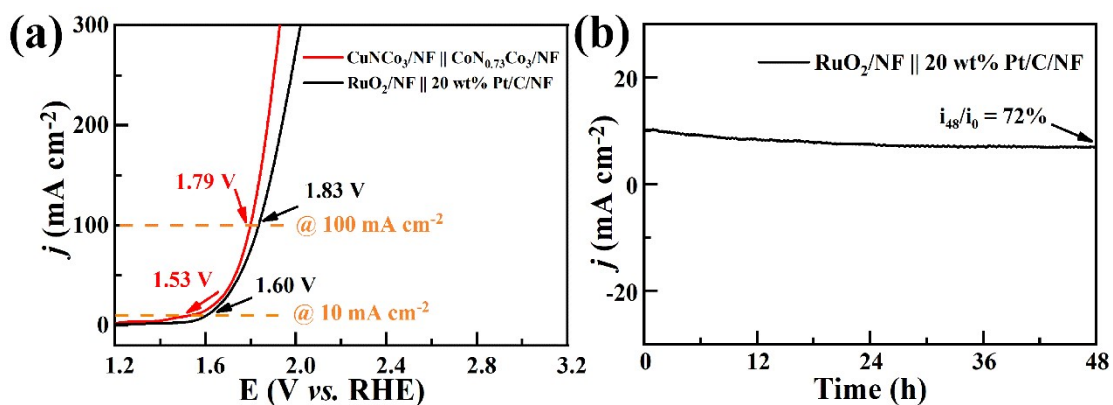

**Fig. S12** (a) LSV curves of two-electrode electrolyzers ( $\text{CuNC}_3/\text{NF} \parallel \text{CoN}_{0.73}\text{Co}_3/\text{NF}$  and  $\text{RuO}_2/\text{NF} \parallel 20 \text{ wt}\% \text{ Pt/C/NF}$ ). (b) Stability test of two-electrode electrolyzer ( $\text{RuO}_2/\text{NF} \parallel 20 \text{ wt}\% \text{ Pt/C/NF}$ ).

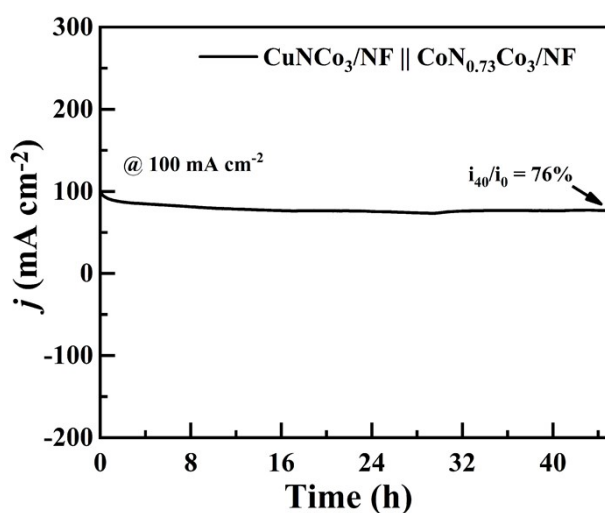

**Fig. S13** The long-term durability test of  $\text{CuNC}_3/\text{NF} \parallel \text{CoN}_{0.73}\text{Co}_3/\text{NF}$  at a current density of  $100 \text{ mA cm}^{-2}$ .

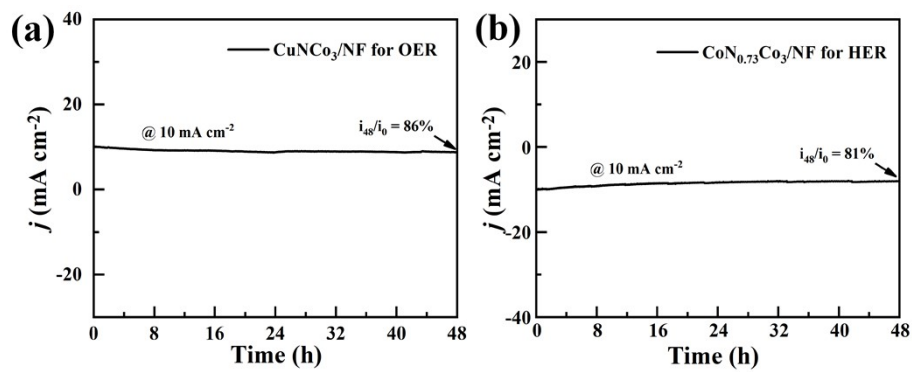

**Fig. S14** Stability tests for (a) OER of CuNCo<sub>3</sub>/NF and (b) HER of CoN<sub>0.73</sub>Co<sub>3</sub>/NF.

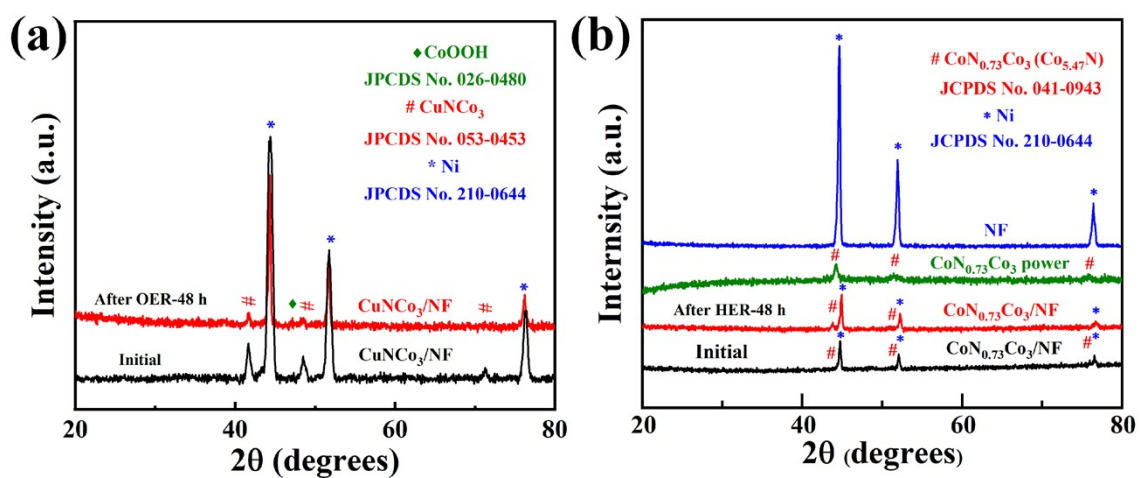

**Fig. S15** XRD patterns of (a) CuNCo<sub>3</sub>/NF, (b) CoN<sub>0.73</sub>Co<sub>3</sub>/NF electrodes after stability test (48 h).

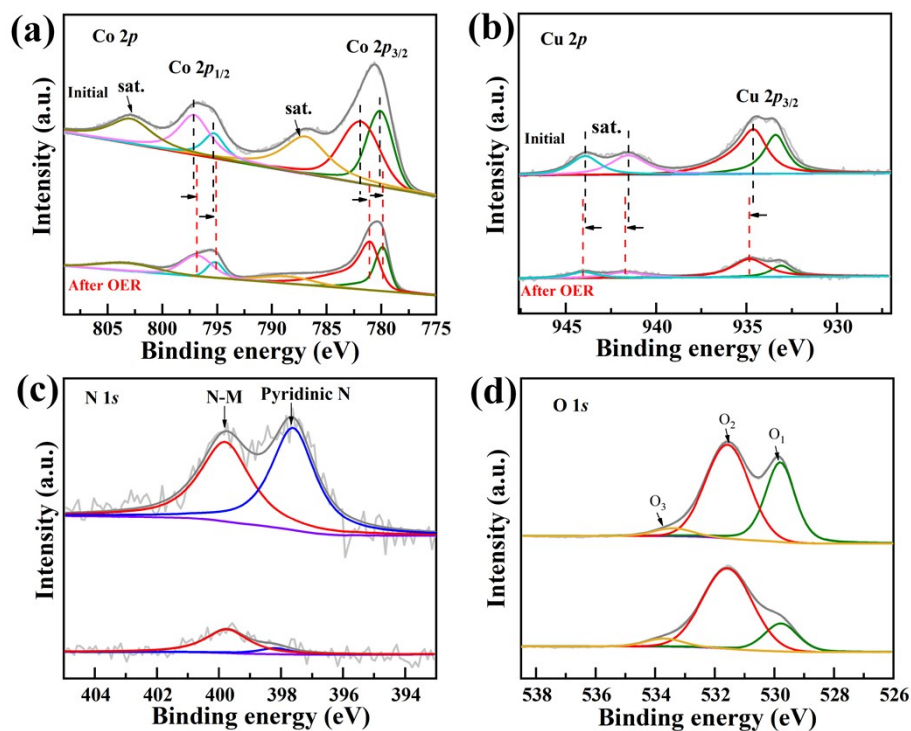

**Fig. S16** The high-resolution XPS results for Co 2p, Cu 2p, N 1s and O 1s of CuNC<sub>3</sub>/NF electrode with initial and after stability test (48 h).

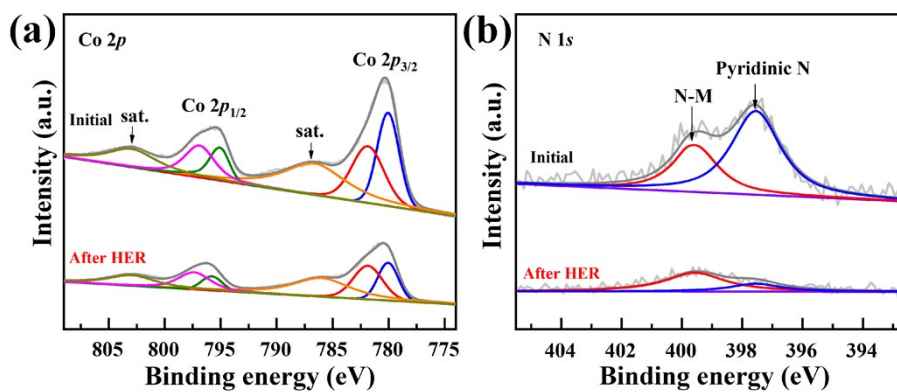

**Fig. S17** The high-resolution XPS results for Co 2p and N 1s of CoN<sub>0.73</sub>Co<sub>3</sub>/NF electrode with initial and after stability test (48 h).

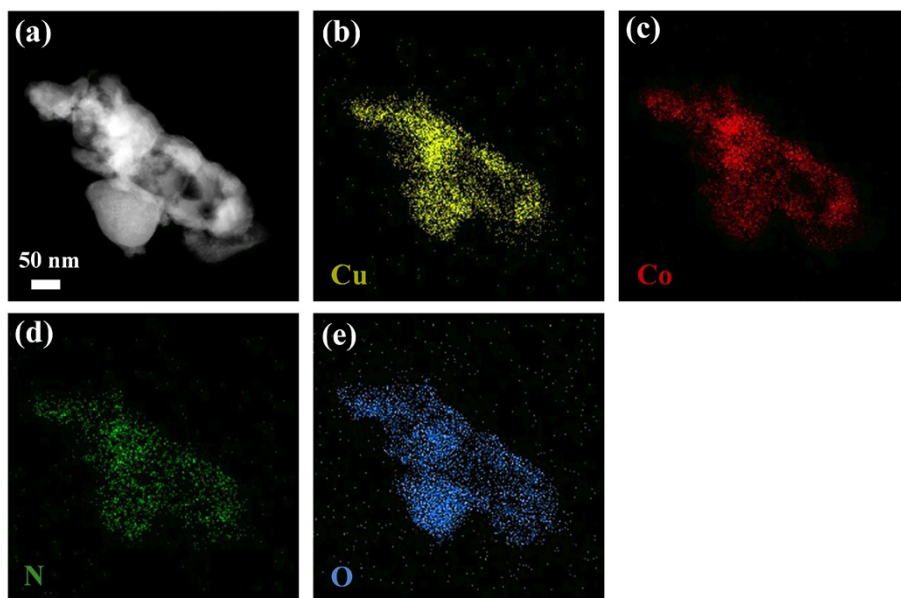

**Fig. S18** The TEM mapping of CuNCo<sub>3</sub> after stability test (48 h).

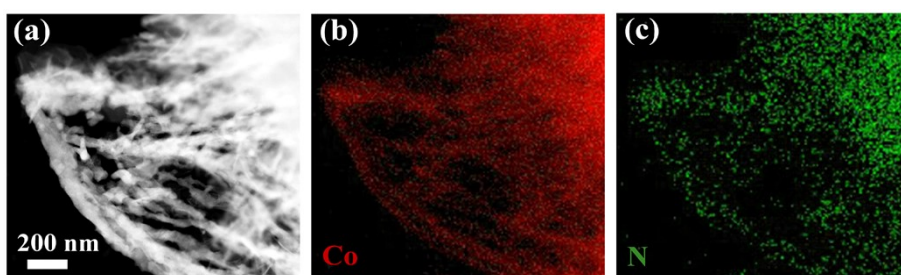

**Fig. S19** The TEM mapping of CoN<sub>0.73</sub>Co<sub>3</sub> after stability test (48 h).

### The calculation of electrochemical surface area:

The electrochemical surface area (ECSA) of each catalyst can be calculated according

$$A_{ECSA} = C_{dl} / (C_s \text{ per ESCA } cm^2)$$

$C_s$  is the specific capacitance of atomically smooth planar surface in respective electrolytic medium.<sup>1</sup> In this work,  $C_s$  was 40  $\mu F cm^{-2}$  for 1.0 M KOH.<sup>2</sup>

**Table S1.** The comparison of various electrocatalysts for overall water splitting.

| Electrocatalysts                                                                            | Morphology                  | iR compensation            | Voltage at<br>10 mA cm <sup>-2</sup><br>(V) | References |
|---------------------------------------------------------------------------------------------|-----------------------------|----------------------------|---------------------------------------------|------------|
| CuNCo <sub>3</sub>   <br>CoN <sub>0.73</sub> Co <sub>3</sub>                                | Nanosheets<br>and Nanowires | With iR<br>compensation    | 1.53                                        | This work  |
| FeNi <sub>3</sub> N    FeNi <sub>3</sub> N                                                  | Nanoparticles               | With iR<br>compensation    | 1.62                                        | 3          |
| V-FeNi <sub>3</sub> N/Ni <sub>3</sub> N   <br>V-FeNi <sub>3</sub> N/Ni <sub>3</sub> N       | Nanoparticles               | With iR<br>compensation    | 1.63                                        | 4          |
| TiN@Ni <sub>3</sub> N   <br>TiN@Ni <sub>3</sub> N                                           | Nanowires                   | With iR<br>compensation    | 1.64                                        | 5          |
| Ni <sub>3</sub> FeN    Ni <sub>3</sub> FeN                                                  | Nanosheets                  | With iR<br>compensation    | 1.495                                       | 6          |
| Co <sub>3</sub> FeN <sub>x</sub>    Co <sub>3</sub> FeN <sub>x</sub>                        | Nanowires                   | With iR<br>compensation    | 1.539                                       | 7          |
| NiCoP/rGO   <br>NiCoP/rGO                                                                   | Nanocrystals                | Without iR<br>compensation | 1.59                                        | 8          |
| InNNi <sub>3</sub> /InNi<br>(oxy)hydroxide   <br>InNNi <sub>3</sub> /InNi<br>(oxy)hydroxide | Core-shell<br>structure     | Without iR<br>compensation | 1.64                                        | 9          |
| CoMoN <sub>x</sub>    CoMoN <sub>x</sub>                                                    | Nanosheets                  | With iR<br>compensation    | 1.55                                        | 10         |
| Fe <sub>3</sub> N@Co <sub>4</sub> N@CoFe<br>  <br>Fe <sub>3</sub> N@Co <sub>4</sub> N@CoFe  | Nanoparticles               | With iR<br>compensation    | 1.59                                        | 11         |

**Table S2.** The comparison of OER activity of the CuNCo<sub>3</sub>/NF with that of other reported catalysts at the current density of 10 mA cm<sup>-2</sup>.

| Electrocatalysts   | $\eta_{10}$ (mV vs.<br>RHE) | Tafel slope<br>(mV dec <sup>-1</sup> ) | Electrolyte | References |
|--------------------|-----------------------------|----------------------------------------|-------------|------------|
| CuNCo <sub>3</sub> | 260                         | 87                                     | 1.0 M KOH   | This work  |



|                                            |     |     |            |    |
|--------------------------------------------|-----|-----|------------|----|
| FeNi <sub>3</sub> N                        | 222 | ~42 | 1.0 M KOH  | 12 |
| HfN                                        | 358 | 85  | 1.0 M NaOH | 13 |
| NiCo <sub>2</sub> N                        | 289 | 46  | 1.0 M KOH  | 14 |
| Fe <sub>2</sub> Ni <sub>2</sub> N/rGO      | 290 | ~41 | 0.1 M KOH  | 15 |
| CoAl-Fe <sub>2</sub> N/Fe <sub>3</sub> N   | 307 | 69  | 1.0 M KOH  | 16 |
| NiMoN-550                                  | 295 | 94  | 1.0 M KOH  | 17 |
| Ni <sub>3</sub> FeN                        | 355 | 70  | 0.1 M KOH  | 18 |
| Ni <sub>0.65</sub> Fe <sub>0.35</sub> @PCN | 310 | 38  | 1.0 M KOH  | 19 |
| NiCoNP                                     | 290 | 41  | 1.0 M KOH  | 20 |

**Table S3.** The comparison of HER activity of the CoN<sub>0.73</sub>Co<sub>3</sub>/NF with that of other reported catalysts at the current density of 10 mA cm<sup>-2</sup>.

| Electrocatalysts                                                  | $\eta_{10}$ (mV vs. RHE) | Tafel slope (mV dec <sup>-1</sup> ) | Electrolyte                          | References |
|-------------------------------------------------------------------|--------------------------|-------------------------------------|--------------------------------------|------------|
| CoN <sub>0.73</sub> Co <sub>3</sub> /NF                           | 31                       | 82                                  | 1.0 M KOH                            | This work  |
| 0.18<br>Ag/Ag <sub>0.80</sub> Ni <sub>0.20</sub> NNi <sub>3</sub> | 81                       | 59                                  | 1.0 M KOH                            | 21         |
| NiCo <sub>2</sub> N                                               | 48                       | ~79                                 | 1.0 M KOH                            | 22         |
| Co <sub>2</sub> Ni <sub>1</sub> N                                 | ~103                     | ~61                                 | 1.0 M KOH                            | 23         |
| Ni/C <sub>3</sub> N <sub>4</sub>                                  | 222                      | 128                                 | 1.0 M NaOH                           | 24         |
| VN/WN@NC                                                          | 122                      | 67                                  | 1.0 M KOH                            | 25         |
| Ru-VN-2                                                           | 144                      | 73                                  | 1.0 M KOH                            | 26         |
| Nb <sub>2</sub> N                                                 | ~96                      | 92                                  | 0.5 M H <sub>2</sub> SO <sub>4</sub> | 27         |
| Ni <sub>3</sub> B-850                                             | 79                       | ~85                                 | 0.5 M H <sub>2</sub> SO <sub>4</sub> | 28         |

---

## References

- 1 C. C. McCrory, S. Jung, I. M. Ferrer, S. M. Chatman, J. C. Peters and T. F. Jaramillo, *J. Am. Chem. Soc.*, 2015, **137**, 4347-4357.
- 2 C. C. McCrory, S. Jung, J. C. Peters and T. F. Jaramillo, *J. Am. Chem. Soc.*, 2013, **135**, 16977-16987.
- 3 B. Zhang, C. Xiao, S. Xie, J. Liang, X. Chen and Y. Tang, *Chem. Mater.*, 2016, **28**, 6934-6941.
- 4 J. Wang, Y. Sun, Y. Qi and C. Wang, *ACS Appl. Mater. Inter.*, 2021, **13**, 57392-57402.
- 5 Q. Zhang, Y. Wang, Y. Wang, A. M. Al-Enizi, A. A. Elzatahry and G. Zheng, *J. Mater. Chem. A*, 2016, **4**, 5713-5718.
- 6 Y. Wang, C. Xie, D. Liu, X. Huang, J. Huo and S. Wang, *ACS Appl. Mater. Inter.*, 2016, **8**, 18652-18657.
- 7 Y. Wang, D. Liu, Z. Liu, C. Xie, J. Huo and S. Wang, *Chem. Commun.*, 2016, **52**, 12614-12617.
- 8 J. Li, M. Yan, X. Zhou, Z.-Q. Huang, Z. Xia, C.-R. Chang, Y. Ma and Y. Qu, *Adv. Funct. Mater.*, 2016, **26**, 6785-6796.
- 9 S. She, Y. Zhu, H. A. Tahini, X. Wu, D. Guan, Y. Chen, J. Dai, Y. Chen, W. Tang, S. C. Smith, H. Wang, W. Zhou and Z. Shao, *Small*, 2020, **16**, 2006800.
- 10 Y. Lu, Z. Li, Y. Xu, L. Tang, S. Xu, D. Li, J. Zhu and D. Jiang, *Chem. Eng. J.*, 2021, **411**, 128433.

- 11 Z. Cui, X. Liang, P. Wang, P. Zhou, Q. Zhang, Z. Wang, Z. Zheng, Y. Liu, Y. Dai and B. Huang, *Electrochim. Acta*, 2021, **395**, 139218.
- 12 Q. Chen, N. Gong, T. Zhu, C. Yang, W. Peng, Y. Li, F. Zhang and X. Fan, *Small*, 2022, **18**, 2105696.
- 13 C. Defilippi, D. V. Shinde, Z. Dang, L. Manna, C. Hardacre, A. J. Greer, C. D'Agostino and C. Giordano, *Angew. Chem. Int. Edit.*, 2019, **58**, 15464-15470.
- 14 A. Saad, Z. Cheng, X. Zhang, S. Liu, H. Shen, T. Thomas, J. Wang and M. Yang, *Adv. Mater. Interfaces*, 2019, **6**, 1900960.
- 15 S. H. Kwag, Y. S. Lee, J. Lee, D. I. Jeong, S. B. Kwon, J. H. Yoo, S. Woo, B. S. Lim, W. K. Park, M.-J. Kim, J. H. Kim, B. Lim, B. K. Kang, W. S. Yang and D. H. Yoon, *ACS Appl. Energy Mater.*, 2019, **2**, 8502-8510.
- 16 Y. Hu, D. Huang, J. Zhang, Y. Huang, M. S. J. T. Balogun and Y. Tong, *ChemCatChem*, 2019, **11**, 6051-6060.
- 17 Z. Yin, Y. Sun, C. Zhu, C. Li, X. Zhang and Y. Chen, *J. Mater. Chem. A*, 2017, **5**, 13648-13658.
- 18 G. Fu, Z. Cui, Y. Chen, L. Xu, Y. Tang and J. B. Goodenough, *Nano Energy*, 2017, **39**, 77-85.
- 19 C. Wu, X. Zhang, Z. Xia, M. Shu, H. Li, X. Xu, R. Si, A. I. Rykov, J. Wang, S. Yu, S. Wang and G. Sun, *J. Mater. Chem. A*, 2019, **7**, 14001-14010.
- 20 Z. Shao, J. Sun, N. Guo, F. He, K. Huang, F. Tian and Q. Wang, *J. Power Sources*, 2019, **422**, 33-41.
- 21 L. Zhu, B. Yang, Z. Wu, C. Li, H. Li, H. Li, Y. Huang, X. Zhu, X. Zhu and Y. Sun,

- J. Mater. Sci. Technol.*, 2022, **112**, 222-229.
- 22 L. Yu, S. Song, B. McElhenny, F. Ding, D. Luo, Y. Yu, S. Chen and Z. Ren, *J. Mater. Chem. A*, 2019, **7**, 19728-19732.
- 23 X. Feng, H. Wang, X. Bo and L. Guo, *ACS Appl. Mater. Inter.*, 2019, **11**, 8018-8024.
- 24 L. Wang, Y. Li, X. Yin, Y. Wang, A. Song, X. Qin and G. Shao, *ACS Sustain. Chem. Eng.*, 2017, **5**, 7993-8003.
- 25 D. He, L. Cao, J. Huang, S. Li, Y. Feng, G. Li, F. Wang and L. Feng, *Chem. Eng. J.*, 2022, 429.
- 26 W. Wang, Y. Shao, Z. Wang, Z. Yang, Z. Zhen, Z. Zhang, C. Mao, X. Guo and G. Li, *ChemElectroChem*, 2020, **7**, 1201-1206.
- 27 Y. Li, J. Zhang, X. Qian, Y. Zhang, Y. Wang, R. Hu, C. Yao and J. Zhu, *Appl. Surf. Sci.*, 2018, **427**, 884-889.
- 28 X. Xu, Y. Deng, M. Gu, B. Sun, Z. Liang, Y. Xue, Y. Guo, J. Tian and H. Cui, *Appl. Surf. Sci.*, 2019, **470**, 591-595.
- 29 N. Zhang, L. Cao, L. Feng, J. Huang, K. Kajiyoshi, C. Li, Q. Liu, D. Yang and J. He, *Nanoscale*, 2019, **11**, 11542-11549.
